# Supplementary material
Source: PubMed Central journal article supplement (PMC4516649)
Supplement: NIHMS706392-supplement-Supplementary_Information.pdf [file NIHMS706392-supplement-Supplementary_Information.pdf]

## **Supporting Information**

### **Lifetimes and Stabilities of familiar explosives molecular adduct complexes during ion mobility measurements**

Alan Mckenzie<sup>1</sup>, John Daniel DeBord<sup>1</sup>, Mark Ridgeway<sup>2</sup>, Melvin Park<sup>2</sup>, Gary Eiceman<sup>3</sup>  
and Francisco Fernandez-Lima<sup>1,\*</sup>

<sup>1</sup>*Department of Chemistry and Biochemistry, Florida International University, Miami,  
FL 33199, USA.*

<sup>2</sup>*Bruker Daltonics, Inc., Billerica, Massachusetts 01821, USA*

<sup>3</sup>*Department of Chemistry, New Mexico State University, Las Cruces, NM*

Figure S1. Optimized structures of the molecular adduct complexes of TNT, RDX, PETN and HMS.

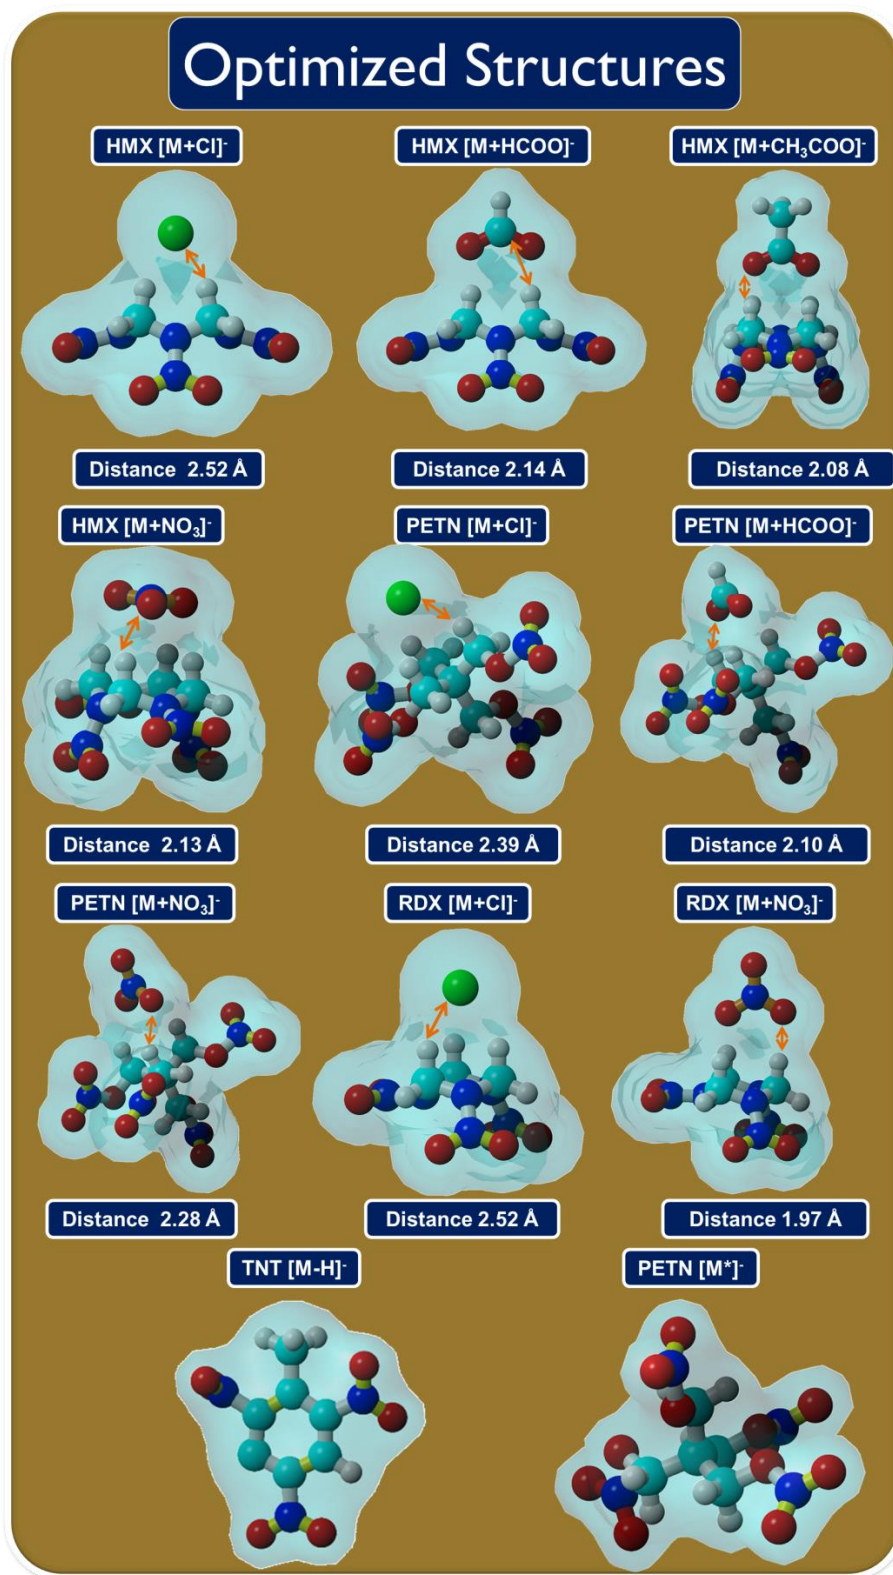

Table S1. Optimized geometry files, charges and structures utilized to calculate the CCS in MOBCAL.

| TNT                |                                                                                   |   |        |             |
|--------------------|-----------------------------------------------------------------------------------|---|--------|-------------|
| [M-H] <sup>-</sup> |                                                                                   |   |        |             |
| 1                  |                                                                                   |   |        |             |
| 20                 |                                                                                   |   |        |             |
| ang                |                                                                                   |   |        |             |
| calc               |                                                                                   |   |        |             |
| 1                  |                                                                                   |   |        |             |
|                    | 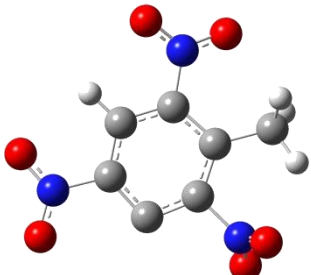 |   |        |             |
| X                  | Y                                                                                 | Z | Atom # | ESP Charges |
| 2.750958           | 0.001056                                                                          | 0 | 12     | -0.669564   |
| 1.403681           | 0.000544                                                                          | 0 | 12     | 0.025134    |
| 0.569041           | -1.231409                                                                         | 0 | 12     | 0.145063    |
| -0.806829          | -1.214515                                                                         | 0 | 12     | -0.423731   |
| -1.510661          | -0.000584                                                                         | 0 | 12     | 0.249954    |
| -0.807779          | 1.213893                                                                          | 0 | 12     | -0.423704   |
| 0.568081           | 1.231861                                                                          | 0 | 12     | 0.145039    |
| 1.144085           | 2.561020                                                                          | 0 | 14     | 0.671619    |
| 0.400576           | 3.548814                                                                          | 0 | 16     | -0.514657   |
| 2.357861           | 2.691424                                                                          | 0 | 16     | -0.480116   |
| -2.935022          | -0.001138                                                                         | 0 | 14     | 0.602739    |
| -3.534707          | 1.094430                                                                          | 0 | 16     | -0.492816   |

|           |           |   |    |           |
|-----------|-----------|---|----|-----------|
| -3.533853 | -1.097178 | 0 | 16 | -0.492818 |
| 1.146090  | -2.560135 | 0 | 14 | 0.671627  |
| 2.359979  | -2.689581 | 0 | 16 | -0.480112 |
| 0.403334  | -3.548510 | 0 | 16 | -0.51466  |
| 3.296371  | -0.926327 | 0 | 1  | 0.246534  |
| 3.295656  | 0.928867  | 0 | 1  | 0.246533  |
| -1.350450 | -2.148101 | 0 | 1  | 0.243972  |
| -1.352119 | 2.147059  | 0 | 1  | 0.243964  |

|                     |                                                                                     |           |        |             |
|---------------------|-------------------------------------------------------------------------------------|-----------|--------|-------------|
| RDX                 |                                                                                     |           |        |             |
| [M+Cl] <sup>-</sup> |                                                                                     |           |        |             |
| 1                   |                                                                                     |           |        |             |
| 22                  |                                                                                     |           |        |             |
| ang                 |                                                                                     |           |        |             |
| calc                |                                                                                     |           |        |             |
| 1                   |                                                                                     |           |        |             |
|                     | 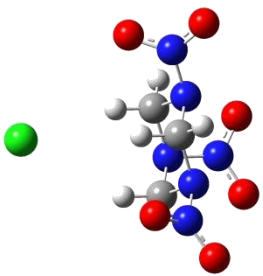 |           |        |             |
| X                   | Y                                                                                   | Z         | Atom # | ESP Charges |
| -0.713117           | -0.016687                                                                           | 1.243280  | 12     | -0.127403   |
| 0.619782            | 0.566343                                                                            | 1.201934  | 14     | -0.197300   |
| 0.910031            | 1.343218                                                                            | -0.011003 | 12     | -0.130355   |
| 0.617745            | 0.549083                                                                            | -1.212368 | 14     | -0.201476   |

|           |           |           |    |           |
|-----------|-----------|-----------|----|-----------|
| -0.715507 | -0.033988 | -1.243061 | 12 | -0.127207 |
| -0.899125 | -0.811955 | 0.005695  | 14 | -0.000726 |
| -1.894963 | -1.762041 | 0.013296  | 14 | 0.669666  |
| -2.290512 | -2.177815 | -1.079877 | 16 | -0.446854 |
| -2.287502 | -2.163428 | 1.112897  | 16 | -0.446630 |
| 1.660379  | -0.176823 | -1.800776 | 14 | 0.723680  |
| 2.804102  | 0.226112  | -1.598055 | 16 | -0.415474 |
| 1.353722  | -1.110668 | -2.542383 | 16 | -0.437511 |
| 1.663566  | -0.148554 | 1.801307  | 14 | 0.719455  |
| 1.358562  | -1.072245 | 2.556241  | 16 | -0.436646 |
| 2.806508  | 0.253817  | 1.593173  | 16 | -0.414519 |
| -1.422181 | 0.824994  | 1.246455  | 1  | 0.184649  |
| -0.823003 | -0.658809 | 2.108460  | 1  | 0.183495  |
| 1.941960  | 1.673930  | -0.014281 | 1  | 0.199214  |
| 0.195156  | 2.177577  | -0.016474 | 1  | 0.179116  |
| -0.827308 | -0.687995 | -2.099040 | 1  | 0.183703  |
| -1.424307 | 0.807813  | -1.256862 | 1  | 0.185191  |
| -2.168205 | 2.879334  | -0.017832 | 28 | -0.846069 |

RDX

| [M+NO <sub>3</sub> ] <sup>-</sup> |                                                                                   |           |        |             |
|-----------------------------------|-----------------------------------------------------------------------------------|-----------|--------|-------------|
| 1                                 |                                                                                   |           |        |             |
| 25                                |                                                                                   |           |        |             |
| ang                               |                                                                                   |           |        |             |
| calc                              |                                                                                   |           |        |             |
| 1                                 |                                                                                   |           |        |             |
|                                   | 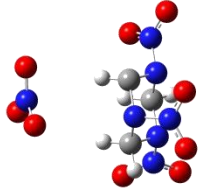 |           |        |             |
| X                                 | Y                                                                                 | Z         | Atom # | ESP Charges |
| 0.03258                           | 0.641167                                                                          | 1.242867  | 12     | -0.166948   |
| -0.468995                         | -0.723678                                                                         | 1.205694  | 14     | -0.220514   |
| -0.115485                         | -1.477992                                                                         | -0.005767 | 12     | -0.257471   |
| -0.475011                         | -0.716824                                                                         | -1.211301 | 14     | -0.225139   |
| 0.025891                          | 0.648492                                                                          | -1.24324  | 12     | -0.160871   |
| -0.408752                         | 1.324192                                                                          | 0.002945  | 14     | 0.013967    |
| -0.381243                         | 2.703634                                                                          | 0.006797  | 14     | 0.680895    |
| -0.396326                         | 3.272373                                                                          | -1.087548 | 16     | -0.444198   |
| -0.39073                          | 3.266147                                                                          | 1.10439   | 16     | -0.444151   |
| -1.725521                         | -0.95777                                                                          | -1.80095  | 14     | 0.762461    |
| -2.235039                         | -2.056302                                                                         | -1.595706 | 16     | -0.417753   |
| -2.178725                         | -0.087199                                                                         | -2.543972 | 16     | -0.445293   |
| -1.716304                         | -0.967894                                                                         | 1.800497  | 14     | 0.760397    |
| -2.165514                         | -0.101447                                                                         | 2.550749  | 16     | -0.444888   |
| -2.22704                          | -2.065194                                                                         | 1.591677  | 16     | -0.417464   |
| 1.127983                          | 0.581989                                                                          | 1.25124   | 1      | 0.216803    |

|           |           |           |    |           |
|-----------|-----------|-----------|----|-----------|
| -0.358221 | 1.167563  | 2.105014  | 1  | 0.191861  |
| -0.61223  | -2.441391 | -0.007271 | 1  | 0.23686   |
| 0.97879   | -1.587643 | -0.008425 | 1  | 0.291573  |
| -0.369972 | 1.179566  | -2.100184 | 1  | 0.190476  |
| 1.12119   | 0.589879  | -1.258397 | 1  | 0.214791  |
| 2.997374  | -1.786698 | 0.006186  | 16 | -0.655485 |
| 3.608052  | -0.67423  | -0.004122 | 14 | 0.986512  |
| 2.922515  | 0.403481  | -0.007499 | 16 | -0.664811 |
| 4.852105  | -0.629157 | -0.011032 | 16 | -0.581608 |

|                     |          |           |        |             |
|---------------------|----------|-----------|--------|-------------|
| HMX                 |          |           |        |             |
| [M+Cl] <sup>-</sup> |          |           |        |             |
| 1                   |          |           |        |             |
| 29                  |          |           |        |             |
| ang                 |          |           |        |             |
| calc                |          |           |        |             |
| 1                   |          |           |        |             |
| X                   | Y        | Z         | Atom # | ESP Charges |
| -1.280590           | 0.636044 | 1.265014  | 12     | -0.363223   |
| -0.000016           | 0.000149 | 1.537468  | 14     | 0.115953    |
| 1.280499            | 0.636218 | 1.265060  | 12     | -0.360283   |
| 1.877347            | 0.186910 | 0.000012  | 14     | 0.238469    |
| 1.280511            | 0.635944 | -1.265129 | 12     | -0.360285   |

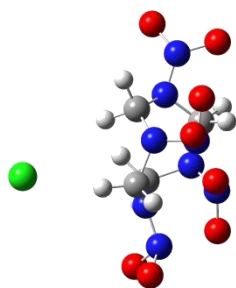

|           |           |           |    |           |
|-----------|-----------|-----------|----|-----------|
| 0.000013  | -0.000204 | -1.537450 | 14 | 0.115972  |
| -1.280546 | 0.635784  | -1.265121 | 12 | -0.363187 |
| -1.877342 | 0.186465  | -0.000021 | 14 | 0.218278  |
| -3.217196 | -0.170829 | 0.000007  | 14 | 0.630980  |
| -3.768397 | -0.319063 | 1.092173  | 16 | -0.439021 |
| -3.768403 | -0.319315 | -1.092122 | 16 | -0.439017 |
| 0.000071  | -1.290322 | -2.040773 | 14 | 0.534527  |
| 1.097690  | -1.808244 | -2.248100 | 16 | -0.392940 |
| -1.097500 | -1.808293 | -2.248249 | 16 | -0.390763 |
| 3.217054  | -0.170857 | 0.000034  | 14 | 0.613797  |
| 3.768248  | -0.319260 | 1.092185  | 16 | -0.435060 |
| 3.768183  | -0.319507 | -1.092115 | 16 | -0.435060 |
| 0.000034  | -1.289889 | 2.041029  | 14 | 0.534547  |
| -1.097540 | -1.807833 | 2.248544  | 16 | -0.390762 |
| 1.097648  | -1.807786 | 2.248435  | 16 | -0.392943 |
| -1.078510 | 1.712935  | 1.194856  | 1  | 0.191220  |
| -1.984776 | 0.411115  | 2.060108  | 1  | 0.205810  |
| 1.984700  | 0.411298  | 2.060146  | 1  | 0.204645  |
| 1.078269  | 1.713093  | 1.195046  | 1  | 0.186312  |
| 1.984740  | 0.410909  | -2.060159 | 1  | 0.204653  |
| 1.078224  | 1.712816  | -1.195306 | 1  | 0.186301  |
| -1.984729 | 0.410784  | -2.060198 | 1  | 0.205793  |
| -1.078381 | 1.712665  | -1.195110 | 1  | 0.191209  |



|          |          |           |    |           |
|----------|----------|-----------|----|-----------|
| 0.000120 | 3.656170 | -0.000380 | 28 | -0.815922 |
|----------|----------|-----------|----|-----------|

|                                         |
|-----------------------------------------|
| HMX                                     |
| [M+CH <sub>3</sub> COOH-H] <sup>-</sup> |
| 1                                       |
| 35                                      |
| ang                                     |
| calc                                    |
| 1.0000                                  |

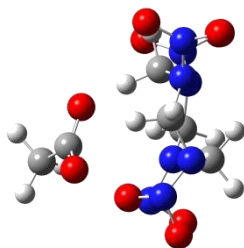

| X         | Y         | Z         | Atom # | ESP Charges |
|-----------|-----------|-----------|--------|-------------|
| -1.256969 | 0.355496  | 1.268469  | 12     | -0.595280   |
| -0.036181 | -0.398945 | 1.514136  | 14     | 0.359245    |
| 1.290653  | 0.148889  | 1.268003  | 12     | -0.622339   |
| 1.866985  | -0.316121 | 0.000024  | 14     | 0.319646    |
| 1.290605  | 0.148486  | -1.268061 | 12     | -0.622135   |
| -0.036024 | -0.399862 | -1.514281 | 14     | 0.359092    |
| -1.257100 | 0.354333  | -1.269470 | 12     | -0.595410   |
| -1.901106 | -0.010740 | -0.000286 | 14     | 0.275302    |
| -3.261611 | -0.256689 | -0.000129 | 14     | 0.620637    |
| -3.825917 | -0.355017 | 1.092297  | 16     | -0.436176   |
| -3.825900 | -0.356240 | -1.092460 | 16     | -0.436190   |
| -0.140597 | -1.692730 | -1.993879 | 14     | 0.462673    |
| 0.911628  | -2.301906 | -2.191492 | 16     | -0.382661   |

|           |           |           |    |           |
|-----------|-----------|-----------|----|-----------|
| -1.276932 | -2.125713 | -2.190609 | 16 | -0.381439 |
| 3.162585  | -0.798420 | 0.000097  | 14 | 0.626215  |
| 3.700689  | -0.994014 | 1.092591  | 16 | -0.443151 |
| 3.700833  | -0.994089 | -1.092312 | 16 | -0.443138 |
| -0.141297 | -1.691415 | 1.994645  | 14 | 0.462633  |
| -1.277839 | -2.123827 | 2.191457  | 16 | -0.381419 |
| 0.910659  | -2.300854 | 2.192906  | 16 | -0.382691 |
| -0.950158 | 1.410644  | 1.237537  | 1  | 0.300891  |
| -1.974184 | 0.174274  | 2.063303  | 1  | 0.230014  |
| 1.968631  | -0.144450 | 2.063795  | 1  | 0.238066  |
| 1.156960  | 1.239550  | 1.235077  | 1  | 0.297998  |
| 1.968793  | -0.144660 | -2.063750 | 1  | 0.237992  |
| 1.156454  | 1.239092  | -1.235265 | 1  | 0.297896  |
| -1.974227 | 0.171846  | -2.064089 | 1  | 0.230061  |
| -0.950853 | 1.409666  | -1.239618 | 1  | 0.300954  |
| 1.556955  | 5.446514  | -0.004656 | 1  | 0.091316  |
| 0.483040  | 5.214906  | -0.001065 | 12 | -0.442257 |
| 0.307047  | 3.688081  | -0.000230 | 12 | 0.975277  |
| 0.047361  | 5.659254  | 0.899601  | 1  | 0.086128  |
| 0.041712  | 5.658747  | -0.899246 | 1  | 0.086167  |
| 0.255940  | 3.112050  | 1.127833  | 16 | -0.846886 |
| 0.254290  | 3.111214  | -1.127817 | 16 | -0.847029 |

| HMX                                                                               |           |           |        |             |
|-----------------------------------------------------------------------------------|-----------|-----------|--------|-------------|
| [M+NO <sub>3</sub> ] <sup>-</sup>                                                 |           |           |        |             |
| 1                                                                                 |           |           |        |             |
| 32                                                                                |           |           |        |             |
| ang                                                                               |           |           |        |             |
| calc                                                                              |           |           |        |             |
| 1                                                                                 |           |           |        |             |
| 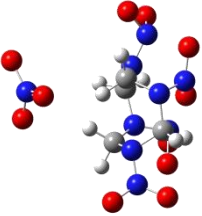 |           |           |        |             |
| X                                                                                 | Y         | Z         | Atom # | ESP Charges |
| 1.285739                                                                          | 0.376327  | -1.280849 | 12     | -0.189881   |
| 0.026455                                                                          | -0.309189 | -1.531470 | 14     | -0.142322   |
| -1.284264                                                                         | 0.273035  | -1.280705 | 12     | 0.014395    |
| -1.863430                                                                         | -0.157011 | -0.003823 | 14     | 0.099583    |
| -1.285166                                                                         | 0.311965  | 1.259884  | 12     | -0.167862   |
| 0.024492                                                                          | -0.267296 | 1.526700  | 14     | 0.113122    |
| 1.283734                                                                          | 0.414019  | 1.261350  | 12     | -0.234359   |
| 1.898518                                                                          | -0.005706 | -0.003416 | 14     | 0.128115    |
| 3.251579                                                                          | -0.320952 | 0.001941  | 14     | 0.624758    |
| 3.805773                                                                          | -0.470362 | -1.087443 | 16     | -0.428573   |
| 3.806053                                                                          | -0.431718 | 1.095731  | 16     | -0.429318   |
| 0.075098                                                                          | -1.559268 | 2.026318  | 14     | 0.483787    |
| -1.001112                                                                         | -2.120401 | 2.230874  | 16     | -0.380974   |
| 1.191909                                                                          | -2.035061 | 2.229832  | 16     | -0.374731   |
| -3.185182                                                                         | -0.586281 | 0.001982  | 14     | 0.620406    |

|           |           |           |    |           |
|-----------|-----------|-----------|----|-----------|
| -3.724412 | -0.783096 | -1.087124 | 16 | -0.427641 |
| -3.727641 | -0.743298 | 1.095869  | 16 | -0.428025 |
| 0.078332  | -1.614322 | -1.998882 | 14 | 0.618244  |
| 1.195457  | -2.094285 | -2.188781 | 16 | -0.399743 |
| -0.997205 | -2.180394 | -2.191518 | 16 | -0.410982 |
| 1.074972  | 1.452926  | -1.279446 | 1  | 0.159732  |
| 1.997346  | 0.135570  | -2.065084 | 1  | 0.193332  |
| -1.973640 | -0.024363 | -2.065317 | 1  | 0.143560  |
| -1.166197 | 1.362599  | -1.278004 | 1  | 0.067653  |
| -1.975172 | 0.039033  | 2.052765  | 1  | 0.171936  |
| -1.150499 | 1.398906  | 1.236171  | 1  | 0.089801  |
| 1.993502  | 0.195795  | 2.053793  | 1  | 0.188121  |
| 1.060787  | 1.487698  | 1.238804  | 1  | 0.122826  |
| 0.788575  | 3.512218  | -0.793544 | 16 | -0.590839 |
| -0.207442 | 3.446332  | -0.019958 | 14 | 0.909188  |
| -1.376827 | 3.397796  | -0.491810 | 16 | -0.573864 |
| -0.029357 | 3.363054  | 1.231976  | 16 | -0.569446 |

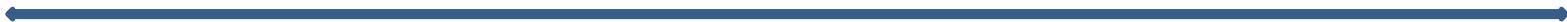

| PETN                                                                              |           |           |        |             |
|-----------------------------------------------------------------------------------|-----------|-----------|--------|-------------|
| [M*]                                                                              |           |           |        |             |
| 1                                                                                 |           |           |        |             |
| 29                                                                                |           |           |        |             |
| ang                                                                               |           |           |        |             |
| calc                                                                              |           |           |        |             |
| 1                                                                                 |           |           |        |             |
| 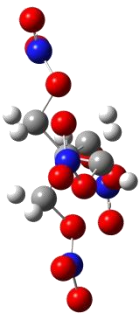 |           |           |        |             |
| X                                                                                 | Y         | Z         | Atom # | ESP Charges |
| 0.687075                                                                          | -1.248249 | 0.170054  | 12     | 0.064415    |
| -0.181022                                                                         | -0.125539 | -0.440166 | 12     | -0.189551   |
| -1.435950                                                                         | -0.792734 | -1.052582 | 12     | -0.074121   |
| -2.145811                                                                         | -1.427387 | 0.031183  | 16     | -0.314517   |
| -3.374501                                                                         | -2.049077 | -0.361118 | 14     | 0.845912    |
| -3.950403                                                                         | -2.553061 | 0.567730  | 16     | -0.365996   |
| -3.668258                                                                         | -1.995465 | -1.536456 | 16     | -0.384242   |
| 0.507790                                                                          | 0.589464  | -1.632509 | 12     | 0.136217    |
| 1.610596                                                                          | 1.421791  | -1.235376 | 16     | -0.312479   |
| 2.919887                                                                          | 0.852080  | -1.396063 | 14     | 0.724347    |
| 3.781643                                                                          | 1.592832  | -1.007776 | 16     | -0.312007   |
| 3.001803                                                                          | -0.250498 | -1.897271 | 16     | -0.348838   |
| -0.557918                                                                         | 0.881428  | 0.666742  | 12     | 0.387326    |
| -1.489633                                                                         | 1.806863  | 0.060723  | 16     | -0.357593   |
| -1.921452                                                                         | 2.855443  | 0.927776  | 14     | 0.811406    |

|           |           |           |    |           |
|-----------|-----------|-----------|----|-----------|
| -1.487957 | 2.850645  | 2.059604  | 16 | -0.381509 |
| -2.684053 | 3.615239  | 0.385767  | 16 | -0.364884 |
| 1.795080  | -0.618961 | 0.848584  | 16 | -0.337221 |
| 2.671790  | -1.546475 | 1.502612  | 14 | 0.814449  |
| 2.393732  | -2.723260 | 1.412155  | 16 | -0.385258 |
| 3.584383  | -0.998185 | 2.062901  | 16 | -0.345229 |
| 1.066114  | -1.910439 | -0.614123 | 1  | 0.118227  |
| 0.111027  | -1.835572 | 0.888696  | 1  | 0.104091  |
| -1.155424 | -1.546327 | -1.796025 | 1  | 0.128234  |
| -2.080691 | -0.048046 | -1.523387 | 1  | 0.129816  |
| -0.186791 | 1.295998  | -2.093514 | 1  | 0.080991  |
| 0.841553  | -0.129568 | -2.383565 | 1  | 0.083990  |
| 0.322778  | 1.421210  | 1.016318  | 1  | 0.018640  |
| -1.037457 | 0.378303  | 1.509769  | 1  | 0.025383  |

|                     |
|---------------------|
| PETN                |
| [M+Cl] <sup>-</sup> |
| 1                   |
| 30                  |
| ang                 |
| calc                |
| 1                   |

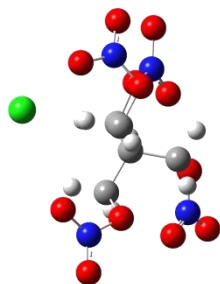

| X         | Y         | Z         | Atom # | ESP Charges |
|-----------|-----------|-----------|--------|-------------|
| 0.563563  | -0.964377 | 0.785729  | 12     | 0.172219    |
| -0.230054 | -0.051086 | -0.172515 | 12     | -0.392951   |
| -1.492050 | -0.826356 | -0.616348 | 12     | 0.311580    |
| -2.266007 | -1.069333 | 0.598339  | 16     | -0.366140   |
| -3.535056 | -1.624931 | 0.385449  | 14     | 0.864343    |
| -4.121839 | -1.868897 | 1.419947  | 16     | -0.427488   |
| -3.906332 | -1.781471 | -0.760358 | 16     | -0.420999   |
| 0.562017  | 0.220982  | -1.483053 | 12     | 0.118964    |
| 1.464270  | 1.345506  | -1.324947 | 16     | -0.286649   |
| 2.858137  | 1.057520  | -1.315189 | 14     | 0.707488    |
| 3.518608  | 2.056076  | -1.126194 | 16     | -0.381517   |
| 3.218937  | -0.079854 | -1.504283 | 16     | -0.320947   |
| -0.595159 | 1.252701  | 0.562524  | 12     | 0.172809    |
| -1.416057 | 2.030201  | -0.354582 | 16     | -0.294759   |
| -1.800732 | 3.288415  | 0.129742  | 14     | 0.827592    |
| -1.447446 | 3.599680  | 1.252065  | 16     | -0.407256   |
| -2.464444 | 3.919721  | -0.663366 | 16     | -0.411283   |
| 1.728107  | -0.195539 | 1.215128  | 16     | -0.274024   |
| 2.539755  | -0.844984 | 2.160320  | 14     | 0.815431    |
| 2.174944  | -1.926713 | 2.575658  | 16     | -0.410372   |
| 3.524669  | -0.202754 | 2.456536  | 16     | -0.410883   |
| 0.877109  | -1.869299 | 0.249864  | 1      | 0.146215    |

|           |           |           |    |           |
|-----------|-----------|-----------|----|-----------|
| -0.025319 | -1.227270 | 1.666943  | 1  | 0.055739  |
| -1.204415 | -1.780358 | -1.081224 | 1  | 0.071452  |
| -2.094796 | -0.225216 | -1.299313 | 1  | 0.042369  |
| -0.113781 | 0.543075  | -2.279205 | 1  | 0.073036  |
| 1.085006  | -0.684568 | -1.806701 | 1  | 0.136377  |
| 0.294223  | 1.828440  | 0.815440  | 1  | 0.068963  |
| -1.174180 | 1.045607  | 1.465375  | 1  | 0.076086  |
| 0.530132  | -3.245101 | -1.881353 | 28 | -0.855393 |

|                          |
|--------------------------|
| PETN                     |
| [M+HCOOH-H] <sup>-</sup> |
| 1                        |
| 33                       |
| ang                      |
| calc                     |
| 1                        |

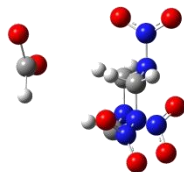

| X         | Y         | Z         | Atom # | ESP Charges |
|-----------|-----------|-----------|--------|-------------|
| 0.664108  | -0.588581 | 0.972726  | 12     | 0.291904    |
| -0.206842 | 0.050524  | -0.130732 | 12     | -0.401483   |
| -1.369220 | -0.936344 | -0.396658 | 12     | 0.096443    |
| -2.193972 | -0.915612 | 0.811006  | 16     | -0.344014   |
| -3.357466 | -1.690244 | 0.739094  | 14     | 0.853621    |
| -3.984227 | -1.697971 | 1.779606  | 16     | -0.427554   |



|           |           |           |    |           |
|-----------|-----------|-----------|----|-----------|
| -3.617716 | -2.236721 | -0.313812 | 16 | -0.415266 |
| 0.534647  | 0.173225  | -1.487125 | 12 | 0.089189  |
| 1.484868  | 1.272570  | -1.491141 | 16 | -0.351482 |
| 2.854499  | 0.932257  | -1.355837 | 14 | 0.771120  |
| 3.569821  | 1.910386  | -1.398844 | 16 | -0.393132 |
| 3.155079  | -0.232674 | -1.228236 | 16 | -0.370137 |
| -0.708639 | 1.421997  | 0.363057  | 12 | 0.375098  |
| -1.654866 | 1.903445  | -0.633824 | 16 | -0.327763 |
| -2.200040 | 3.164427  | -0.358524 | 14 | 0.831139  |
| -1.858876 | 3.722333  | 0.668210  | 16 | -0.423907 |
| -2.972324 | 3.544918  | -1.211585 | 16 | -0.408788 |
| 1.697529  | 0.385697  | 1.315632  | 16 | -0.362068 |
| 2.528479  | 0.002800  | 2.379839  | 14 | 0.800723  |
| 2.291135  | -1.049876 | 2.938311  | 16 | -0.415011 |
| 3.398841  | 0.814355  | 2.615317  | 16 | -0.396090 |
| 1.104283  | -1.522771 | 0.609636  | 1  | 0.181328  |
| 0.071242  | -0.789112 | 1.868048  | 1  | 0.035447  |
| -0.970770 | -1.944845 | -0.556520 | 1  | 0.213281  |
| -1.979029 | -0.613243 | -1.241677 | 1  | 0.078308  |
| -0.169042 | 0.467979  | -2.269241 | 1  | 0.084733  |
| 0.988983  | -0.779349 | -1.784108 | 1  | 0.254448  |
| 0.111264  | 2.135281  | 0.444892  | 1  | 0.039880  |
| -1.222370 | 1.335301  | 1.322423  | 1  | 0.017252  |

|          |           |           |    |           |
|----------|-----------|-----------|----|-----------|
| 0.661092 | -2.716344 | -2.530845 | 16 | -0.857534 |
| 0.764845 | -3.577729 | -1.618348 | 12 | 0.860255  |
| 0.538648 | -3.430969 | -0.383045 | 16 | -0.861746 |
| 1.093485 | -4.600771 | -1.936973 | 1  | -0.118194 |

|                                   |
|-----------------------------------|
| PETN                              |
| [M+NO <sub>3</sub> ] <sup>-</sup> |
| 1                                 |
| 33                                |
| ang                               |
| calc                              |
| 1                                 |

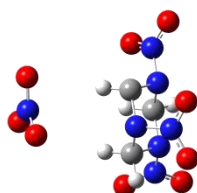

| X         | Y         | Z         | Atom # | ESP Charges |
|-----------|-----------|-----------|--------|-------------|
| -0.668410 | -0.031337 | 1.100097  | 12     | 0.349655    |
| 0.312602  | -0.124288 | -0.089343 | 12     | -0.370339   |
| 0.981876  | 1.264550  | -0.227630 | 12     | 0.160322    |
| 1.800541  | 1.432355  | 0.969724  | 16     | -0.349897   |
| 2.577494  | 2.601769  | 0.988934  | 14     | 0.839424    |
| 3.201815  | 2.733377  | 2.020997  | 16     | -0.417886   |
| 2.554808  | 3.317286  | 0.008879  | 16     | -0.401504   |
| -0.410052 | -0.364075 | -1.440397 | 12     | 0.089751    |
| -0.832182 | -1.742946 | -1.597890 | 16     | -0.350964   |
| -2.212039 | -2.013698 | -1.391847 | 14     | 0.756401    |

|           |           |           |    |           |
|-----------|-----------|-----------|----|-----------|
| -2.469904 | -3.185986 | -1.550353 | 16 | -0.375241 |
| -2.947245 | -1.095522 | -1.107405 | 16 | -0.361948 |
| 1.343325  | -1.233172 | 0.202695  | 12 | 0.293716  |
| 2.332199  | -1.171249 | -0.863062 | 16 | -0.330996 |
| 3.347876  | -2.135970 | -0.771987 | 14 | 0.845417  |
| 3.323576  | -2.900176 | 0.174558  | 16 | -0.422432 |
| 4.144863  | -2.071977 | -1.681716 | 16 | -0.408770 |
| -1.196860 | -1.373528 | 1.317423  | 16 | -0.379422 |
| -2.047991 | -1.491460 | 2.432869  | 14 | 0.800579  |
| -2.225792 | -0.504544 | 3.117616  | 16 | -0.406767 |
| -2.494478 | -2.609906 | 2.566872  | 16 | -0.388113 |
| -1.474911 | 0.671078  | 0.872911  | 1  | 0.136316  |
| -0.151054 | 0.288372  | 2.007340  | 1  | 0.023753  |
| 0.221431  | 2.049462  | -0.271427 | 1  | 0.162130  |
| 1.629607  | 1.303703  | -1.104596 | 1  | 0.065497  |
| 0.290394  | -0.231052 | -2.268105 | 1  | 0.101815  |
| -1.238335 | 0.335091  | -1.576071 | 1  | 0.212662  |
| 0.876665  | -2.217907 | 0.195413  | 1  | 0.059118  |
| 1.842993  | -1.067094 | 1.159114  | 1  | 0.035136  |
| -1.771549 | 2.829599  | 0.159662  | 16 | -0.715352 |
| -2.091940 | 3.121052  | -1.039526 | 14 | 1.075163  |
| -2.896864 | 4.041792  | -1.274740 | 16 | -0.598235 |
| -1.568758 | 2.454728  | -1.987593 | 16 | -0.728987 |
